# Supplementary material
Source: PubMed Central journal article supplement (PMC4135952)

**Supplementary Figure 1. Dot plot of values of percentage of eGFP positive cells for each siRNA.** Candidate genes required for VSV replication were identified as those whose percentage of eGFP positive cells were reduced by more than 3 standard deviations.

**Supplementary Figure 2. siRNA screen identifies select host genes that inhibit VSV replication.** Representative images of VSV replication in siRNA-transfected cells. HeLa cells were transfected with pools of four siRNAs targeting the indicated genes. At 48 h post transfection, cells were infected with rVSV-eGFP at an MOI of 1. Cells were fixed at 7 hpi, nuclei (blue) were labeled by Hoescht stain, and images were taken using the CellWorX microscope.

Supplementary Figure 1

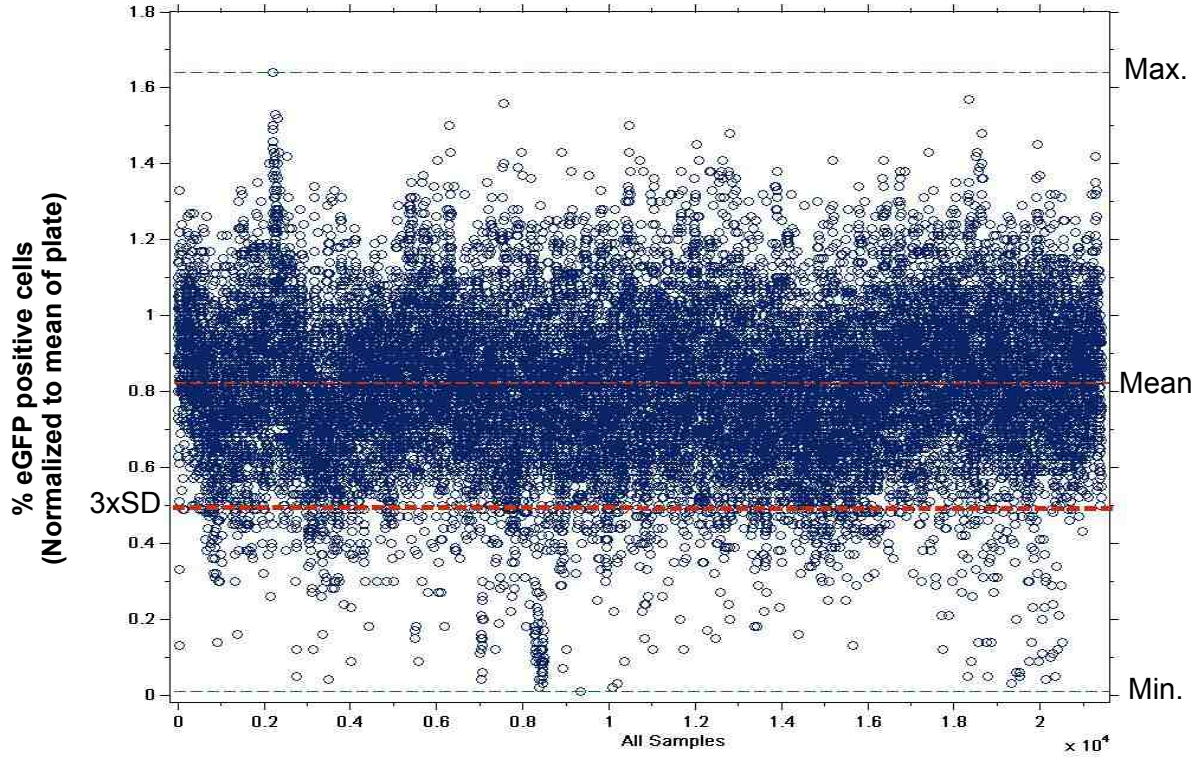

## Supplementary Figure 2

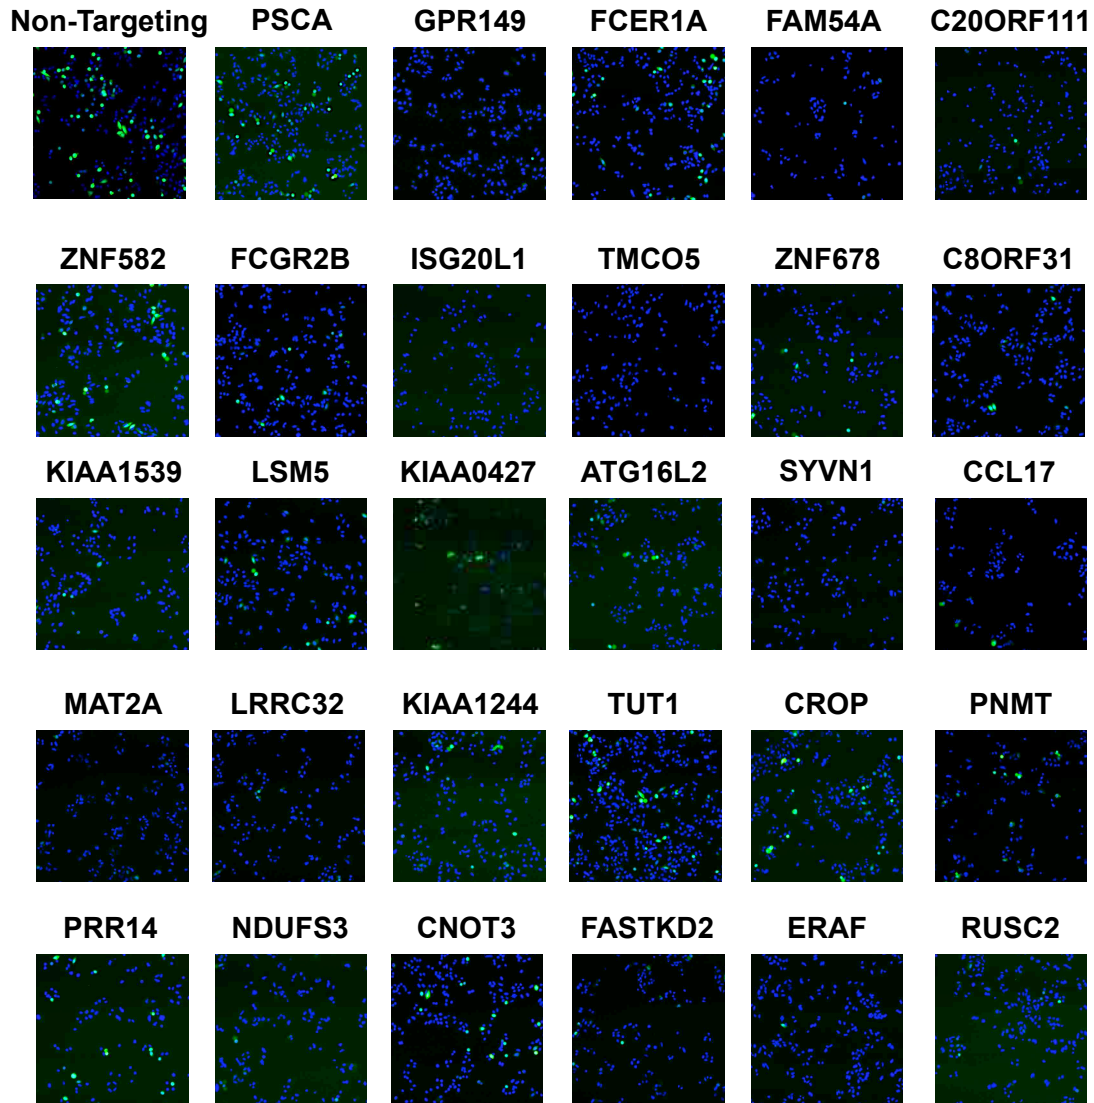

Supplement: JVI.00642-14_zjv999099274so1.pdf [file JVI.00642-14_zjv999099274so1.pdf]
